# Supplementary material
Source: publisher figshare collection journal article supplement (https://diabetesjournals.figshare.com/ndownloader/files/33407960)

**Supplementary Table 1: Treatment-emergent adverse events (TEAE) across all treatment groups.**

Of note skin reactions were over-reported in the 10µg group due to an inconsistency in adverse event collection, these events were treated as expected adverse events in subsequent cohorts. Table shows TEAE reported by 2 or more patients. Excludes 2 uncoded TEAE. N=number of subjects; [E]=number of events; TSH=thyroid stimulating hormone.

Note: For subject counts (N) within each preferred term, subjects were counted only once, even if they experienced multiple events. For event counts [E], every event was included for the category.

|                                               | Placebo<br>N=6<br>n (%) [E] | Study drug<br>10µg<br>N=8<br>n (%) [E] | Study drug<br>100µg<br>N=6<br>n (%) [E] | Study drug<br>500µg<br>N=6<br>n (%) [E] | All Study<br>drug<br>Doses<br>N=20<br>n (%) [E] |
|-----------------------------------------------|-----------------------------|----------------------------------------|-----------------------------------------|-----------------------------------------|-------------------------------------------------|
| Any TEAE                                      | 6 (100)[107]                | 8 (100) [206]                          | 6 (100) [80]                            | 6 (100) [70]                            | 20 (100)<br>[356]                               |
| Hypoglycaemia                                 | 6 (100) [84]                | 8 (100) [156]                          | 6 (100) [61]                            | 6 (100) [53]                            | 20 (100)<br>[270]                               |
| Viral upper<br>respiratory tract<br>infection | 4 (67) [7]                  | 4 (50) [5]                             | 3 (50) [4]                              | 2 (33) [2]                              | 9 (45) [11]                                     |
| Vomiting                                      | 0                           | 5 (63) [7]                             | 1 (17) [1]                              | 0                                       | 6 (30) [8]                                      |
| Rhinitis                                      | 1 (17) [1]                  | 3 (38) [3]                             | 1 (17) [1]                              | 2 (33) [2]                              | 6 (30) [6]                                      |
| Injection site<br>erythema                    | 1 (17) [1]                  | 5 (63) [8]                             | 0                                       | 0                                       | 5 (25) [8]                                      |
| Headache                                      | 2 (33) [2]                  | 0                                      | 1 (17) [1]                              | 3 (50) [3]                              | 4 (20) [4]                                      |
| TSH increased                                 | 0                           | 2 (25) [2]                             | 1 (17) [1]                              | 0                                       | 3 (15) [3]                                      |
| Cough                                         | 0                           | 0                                      | 2 (33) [2]                              | 1 (17) [1]                              | 3 (15) [3]                                      |
| Productive cough                              | 0                           | 3 (38) [3]                             | 0                                       | 0                                       | 3 (15) [3]                                      |
| Dizziness                                     | 1 (17) [1]                  | 0                                      | 2 (33) [3]                              | 0                                       | 2 (10) [3]                                      |
| Diarrhoea                                     | 0                           | 2 (25) [2]                             | 0                                       | 0                                       | 2 (10) [2]                                      |
| Influenza                                     | 0                           | 1 (13) [1]                             | 0                                       | 1 (17) [1]                              | 2 (10) [2]                                      |
| Oropharyngeal<br>pain                         | 1 (17) [1]                  | 1 (13) [1]                             | 1 (17) [1]                              | 0                                       | 2 (10.0) [2]                                    |

**Supplementary Table 2. Details of antibodies used for staining cryopreserved PBMCs to assess T cell immunophenotypes.**

| Marker     | Fluorochrome  | Company           | Clone      |
|------------|---------------|-------------------|------------|
| Live/Dead  | Yellow        | Life Technologies | NA         |
| ICOS/CD278 | BV650         | BD                | DX29       |
| CD73       | BV605         | BioLegend         | AD2        |
| CD3        | BUV805        | BD                | UCHT1      |
| CD4        | BUV395        | BD                | Sk3        |
| CD8        | BUV563        | BD                | RPA-T8     |
| CD14       | BV570         | BioLegend         | M5E2       |
| CD19       | BV570         | BioLegend         | HIB19      |
| CD16       | BUV496        | BD                | 3G8        |
| CD56       | PE-Cy5        | BD                | B159       |
| CD25       | PE            | BD                | 2A3        |
| CD25       | PE            | BD                | M-A251     |
| CD127      | BV786         | BD                | HIL-7R-M21 |
| CD45RA     | APC-Cy7       | BioLegend         | HI100      |
| CD15s      | BV510         | BD                | CSLEX1     |
| CD49d      | BUV737        | BD                | 9F10       |
| CD31       | BV421         | BioLegend         | WM59       |
| CD103      | PE-Dazzle 594 | BioLegend         | Ber-ACT8   |
| HLA-DR     | BUV661        | BD                | G46-6      |
| CD39       | BV711         | BioLegend         | A1         |
| CD27       | APC-R700      | BD                | M-T271     |
| PD-1       | PE-Cy7        | BD                | EH12.1     |
| FOXP3      | AF647         | BD                | 259D/C7    |
| FOXP3      | AF647         | BioLegend         | 206D       |
| Helios     | PerCP-Cy5.5   | BioLegend         | 22F6       |
| Ki67       | FITC          | BD                | 35         |

**Supplementary Table 3. Details of individuals selected for transcriptional profiling of Tregs before/after treatment.**

| Subject | treatment          | End visit | Sex |
|---------|--------------------|-----------|-----|
| 1       | placebo            | 24w       | F   |
| 2       | placebo            | 21w       | F   |
| 3       | placebo            | 24w       | M   |
| 4       | placebo            | 24w       | F   |
| 5       | placebo            | 24w       | F   |
| 6       | MultipepT1De 10ug  | 24w       | F   |
| 7       | MultipepT1De 100ug | 24w       | F   |
| 8       | MultipepT1De 100ug | 24w       | M   |
| 9       | MultipepT1De 100ug | 21w       | F   |
| 10      | MultipepT1De 500ug | 24w       | M   |

**Supplementary Table 4. Details of antibodies used to stain cryopreserved PBMCs for sorting Tregs for gene expression.**

| Marker    | Fluorochrome | Company           | Clone      |
|-----------|--------------|-------------------|------------|
| Live/Dead | Violet       | Life Technologies | NA         |
| CD3       | APC-Cy7      | Biolegend         | OKT3       |
| CD25      | PE           | BD                | 2A3        |
| CD25      | PE           | BD                | SK3        |
| CD127     | AF674        | BD                | HIL-7R-M21 |
| CD4       | FITC         | BD                | SK3        |
| CD14      | Pacific Blue | Invitrogen        | TuK4       |

## Supplementary Figure 1. Gating strategy used for T cell immunophenotype panel.

Supplementary Figure 1

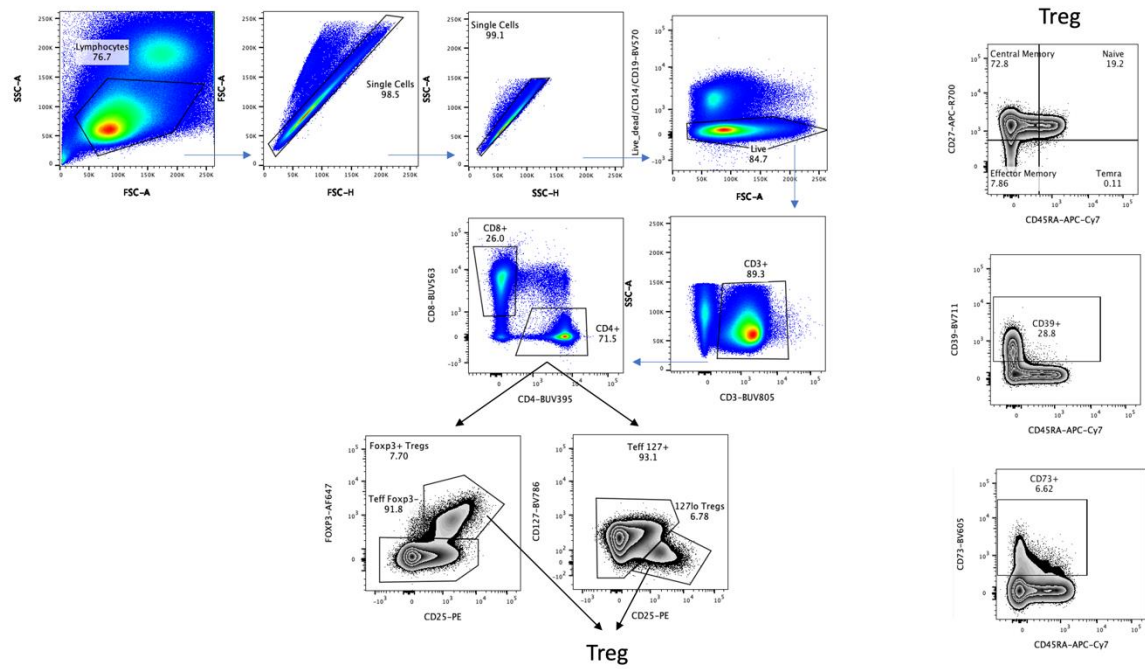

**Supplementary Figure 2.** Individual line plots of (A) glycated haemoglobin, HbA1c (mmol/mol) and (B) mean insulin usage (IU/kg/day) over time. Responses from each individual are joined by a line and different individuals within each cohort are indicated with a different symbol.

**A**

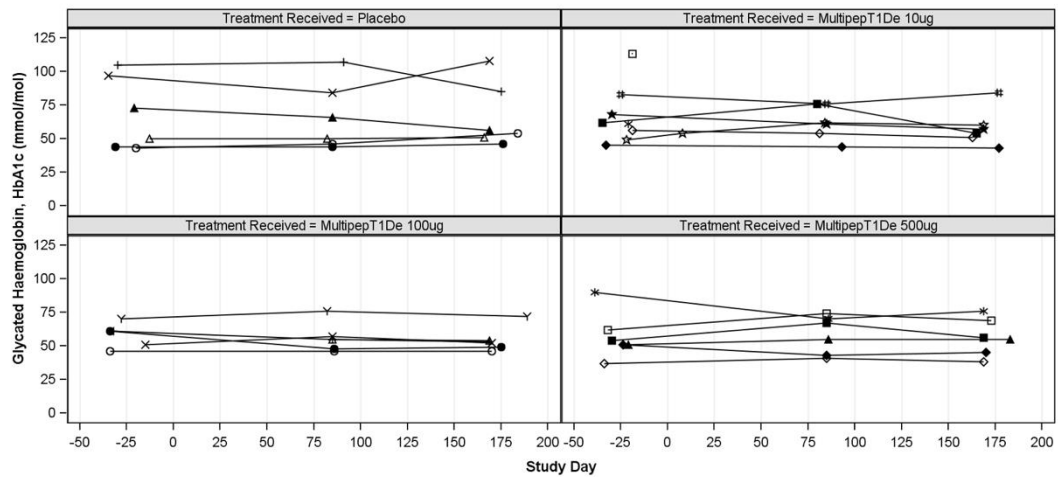

**B**

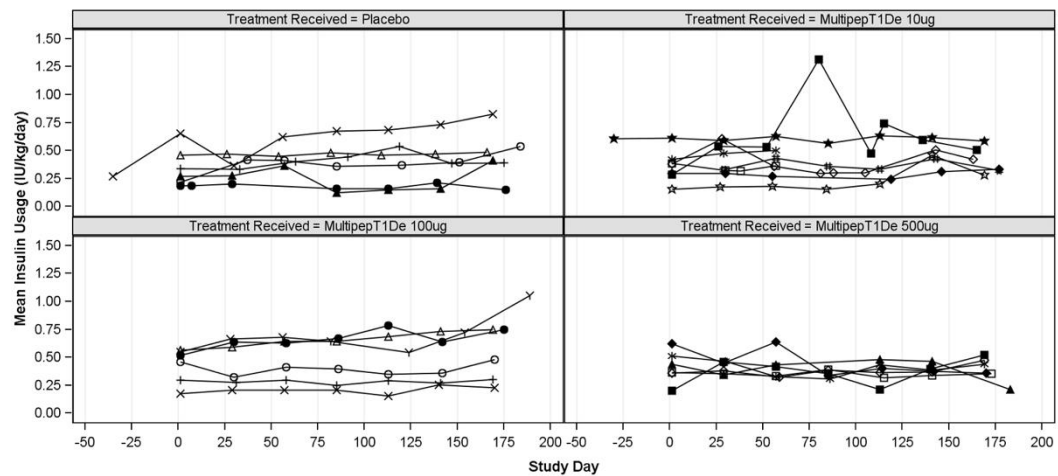

**Supplementary Figure 3.** Individual responses to proinsulin measured by ELISPOT measured at baseline, 12-, 20- and 24-weeks. Responses from each individual are joined by a line and different individuals within each cohort are indicated with a different symbol.

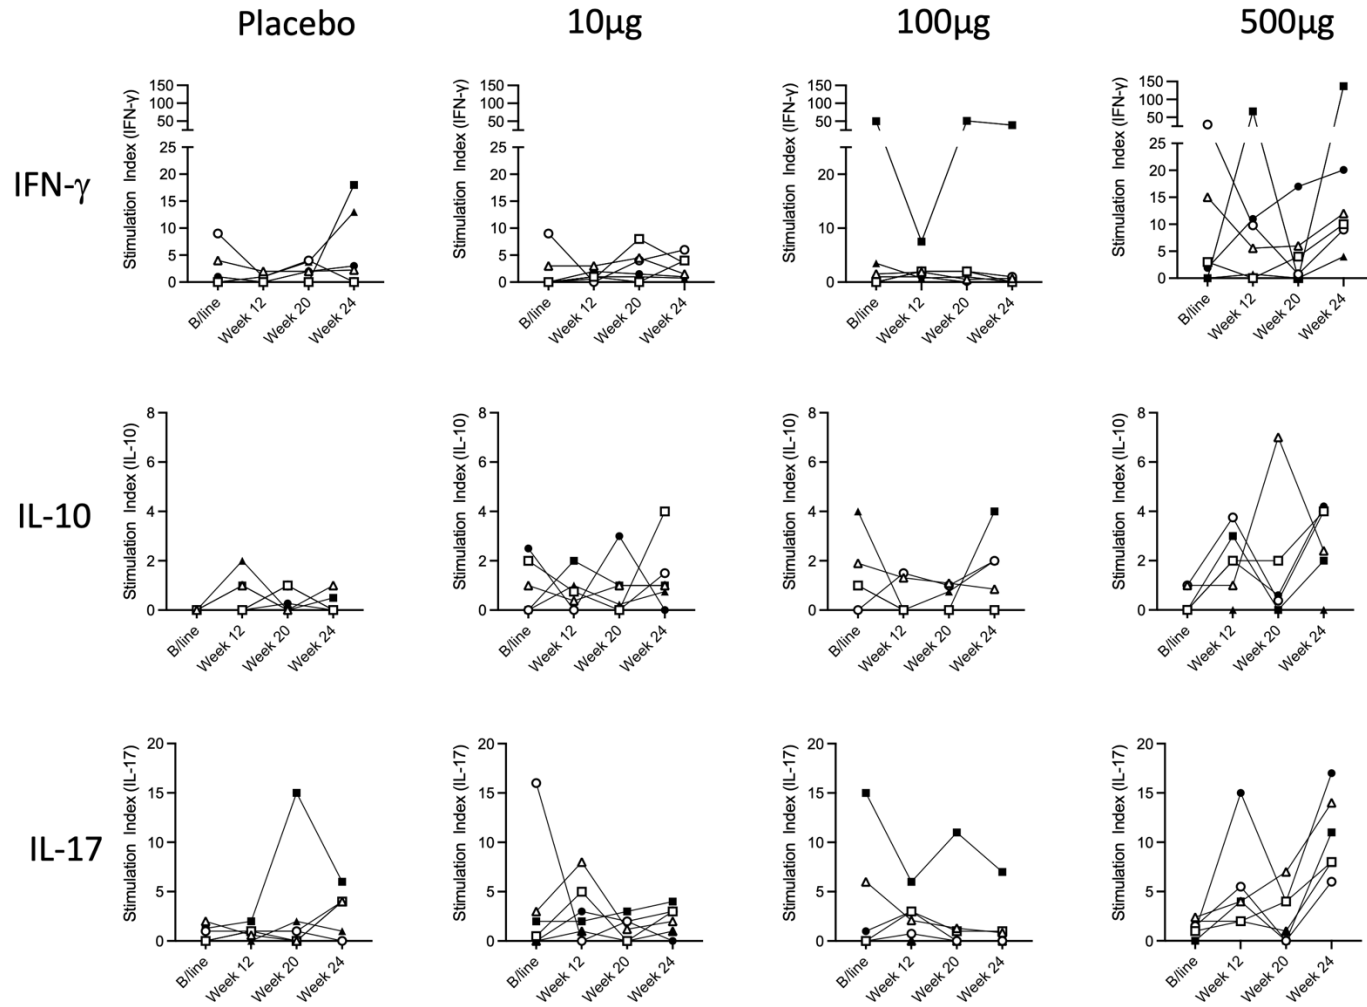

**Supplementary Figure 4.** Fold change in the frequency of FOXP3+ Treg at week 12 and 24 relative to baseline.

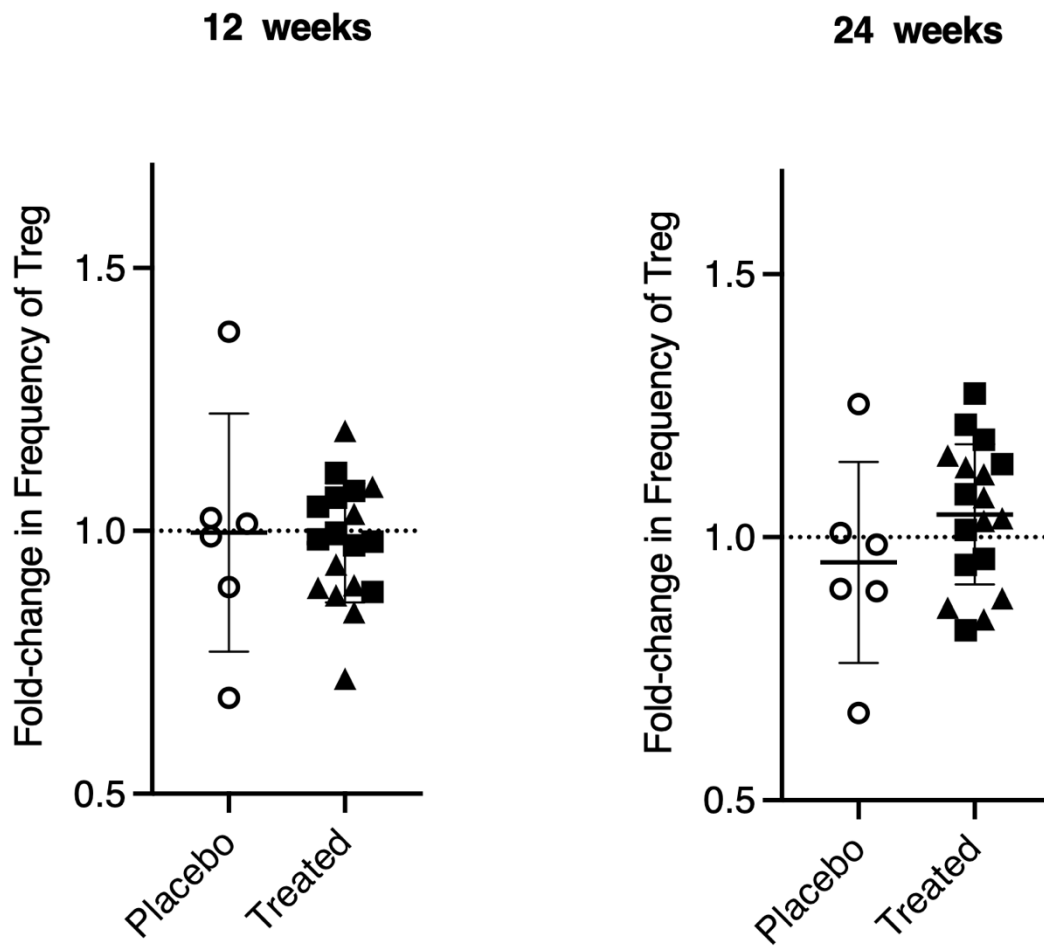

Supplement: Supplementary file 1 [file 33407960]
